# Supplementary material for: Can 2,2,2-trifluoroethanol be an efficient protein denaturant than methanol and ethanol under thermal stress?
Source: Royal Society of Chemistry journal article supplement (doi:10.1039/c8cp01222a), 2018-01-01
Supplement: c8cp01222a1.pdf [file c8cp01222a1.pdf]

## Can 2,2,2-Trifluoroethanol be an efficient protein denaturent than methanol and ethanol under thermal stress?

Dayanidhi Mohanta and Madhurima Jana\*

Molecular Simulation Laboratory, Department of Chemistry,  
National Institute of Technology, Rourkela - 769008, India

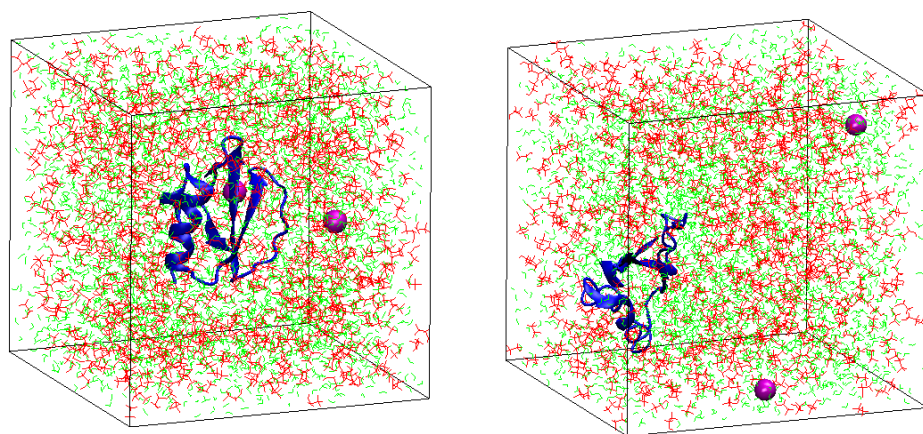

**Figure S1:** A representative simulated snapshot of the protein at 50 % TFE solution (right). The initial starting structure is also shown (left)

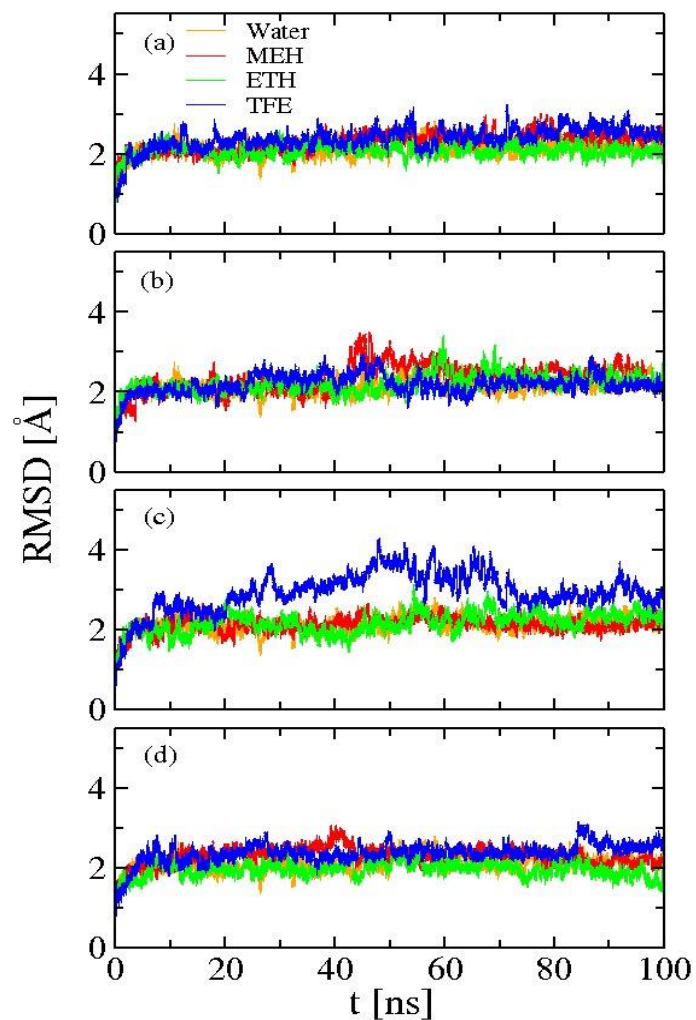

**Figure.S2:** Time evolution of the RMSDs for all the non-hydrogen atoms of the protein in (a) 10% (b) 25% (c) 50% and (d) 75 % MEH, ETH and TFE solutions at 375 K temperature. The plot for RMSDs of protein in water at this temperature is also shown for comparison.
